# Supplementary material for: Visual experience shapes functional connectivity between occipital and non-visual networks
Source: eLife. 2026 Mar 18;13:RP93067. doi: 10.7554/eLife.93067 (PMC12999175; doi:10.7554/eLife.93067)
Supplement: Figure 4—source data 1. [file elife-93067-fig4-data1.xlsx]

## Sheet: Sheet1
Table S1 Post-hoc Bonferroni-corrected paired t-test for the connectivity between occipital regions to prefrontal regions in infants:
	Infants
OC-MTH to PFC-MTH vs. OC-MTH to PFC- EF	t (474) = 10.7, p < 0.001
OC-MTH to PFC-MTH vs. OC-MTH to PFC- LG	t (474) = 24.438, p < 0.001
OC-MTH to PFC- EF vs. OC-MTH to PFC- LG	t (474) = 24.438, p < 0.001
OC-LG to PFC-MTH vs. OC-LG to PFC- EF	t (474) = 3.667, p < 0.001
OC-LG to PFC-MTH vs. OC-LG to PFC-LG	t (474) = 11.269, p < 0.001
OC-LG to PFC-EF vs. OC-LG to PFC-LG	t (474) = 7.581, p < 0.001
OC-EF to PFC-MTH vs. OC-EF to PFC- EF	t (474) = 0.981, p = 0.981
OC- EF to PFC-MTH vs. OC- EF to PFC- LG	t (474) = 16.238, p < 0.001
OC- EF to PFC- EF vs. OC- EF to PFC- LG	t (474) = 13.536, p < 0.001
PFC: prefrontal cortices; OC: occipital cortices; MTH: math-responsive region; LG: language-responsive region; EF: executive function (response-conflict) region.
