# Supplementary material for: Visual experience shapes functional connectivity between occipital and non-visual networks
Source: eLife. 2026 Mar 18;13:RP93067. doi: 10.7554/eLife.93067 (PMC12999175; doi:10.7554/eLife.93067)
Supplement: Supplementary file 1. [file elife-93067-supp1.xlsx]

## Sheet: Sheet1
ROI-wise noise ceiling and One-Way ANOVA results across the three groups
	S(n = 50)		CB(n = 30)		Infants(n = 475)		F	p	partial 𝜂2
	M	SD	M	SD	M	SD
A1_lh	0.922	0.041	0.904	0.055	0.938	0.048	9.034	0	0.032
A1_rh	0.915	0.052	0.908	0.061	0.936	0.046	8.787	0	0.031
PFC-MTH_lh	0.921	0.049	0.923	0.036	0.941	0.046	5.886	0.003	0.021
PFC-MTH_rh	0.92	0.049	0.921	0.038	0.942	0.042	9.076	0	0.032
PFC-LG_lh	0.923	0.05	0.92	0.045	0.937	0.048	3.645	0.027	0.013
PFC-LG_rh	0.908	0.099	0.897	0.08	0.941	0.039	19.469	0	0.066
PFC-EF_lh	0.913	0.057	0.902	0.047	0.936	0.05	10.487	0	0.037
PFC-EF _rh	0.92	0.039	0.893	0.088	0.935	0.051	10.307	0	0.036
SMC_lh	0.903	0.069	0.928	0.049	0.942	0.051	12.839	0	0.044
SMC_rh	0.91	0.072	0.933	0.04	0.941	0.048	8.768	0	0.031
OC-MTH_lh	0.945	0.038	0.931	0.036	0.94	0.051	0.688	0.503	0.002
OC-MTH _rh	0.937	0.067	0.937	0.045	0.943	0.048	0.438	0.645	0.002
OC-EF_lh	0.957	0.033	0.943	0.038	0.935	0.05	4.536	0.011	0.016
OC-EF_rh	0.962	0.024	0.924	0.084	0.938	0.047	6.985	0.001	0.025
OC-LG_lh	0.947	0.047	0.935	0.039	0.934	0.056	1.406	0.246	0.005
OC-LG_rh	0.95	0.038	0.926	0.056	0.935	0.057	2.172	0.115	0.008
V1_lh	0.953	0.027	0.941	0.047	0.921	0.064	6.831	0.001	0.024
V1_rh	0.949	0.039	0.943	0.046	0.922	0.065	5.34	0.005	0.019
PFC: prefrontal cortices; OC: occipital cortices; MTH: math-responsive region; LG: language-responsive region; EF: executive function (response-conflict) region.
